# Supplementary material for: Longitudinal Patterns of Beverage Intake in Treatment-Seeking Children with Obesity in Eastern NC Using the Validated BEVQ-15
Source: MDPI journal article supplement (doi:10.3390/nu15194171), 2023-09-27
Supplement: s1 [file s1]

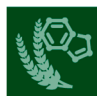

**Table S1.** Multivariable quantile regression of energy intake from Soda (kcal/day; N=321 visits).

| Variable                     | Coefficient | 95% CI      | P     |
|------------------------------|-------------|-------------|-------|
| Time since baseline (months) | -0.7        | -1.2, -0.1  | 0.014 |
| Sex                          |             |             |       |
| Female                       | Ref.        |             |       |
| Male                         | -0.5        | -12.5, 11.5 | 0.938 |
| Age (years)                  | 1.3         | -0.8, 3.5   | 0.220 |
| Race/ethnicity               |             |             |       |
| Non-Hispanic Black           | Ref.        |             |       |
| Non-Hispanic White           | 20.1        | -14.1, 55.9 | 0.241 |
| Hispanic or Latino           | 0.8         | -13.1, 14.7 | 0.910 |
| Other                        | -4.5        | -24.6, 15.5 | 0.656 |
| Medicaid insurance           | 15.3        | -1.0, 31.7  | 0.066 |
| Family composition           |             |             |       |
| Two parents                  | Ref.        |             |       |
| Mother only                  | -1.8        | -14.4, 10.9 | 0.783 |
| Other                        | -3.4        | -24.8, 18.1 | 0.757 |
| Food insecurity              | -1.5        | -15.5, 12.4 | 0.830 |
| Meals out (days/week)        | 3.3         | -1.6, 8.2   | 0.182 |
| Breakfast (days/week)        | 0.4         | -1.9, 2.7   | 0.730 |

CI, confidence interval; Ref., reference category.

**Table S2.** Multivariable quantile regression of energy intake from 100% Juice (kcal/day; N=321 visits).

| Variable                     | Coefficient | 95% CI       | P      |
|------------------------------|-------------|--------------|--------|
| Time since baseline (months) | -0.4        | -1.5, 0.6    | 0.428  |
| Sex                          |             |              |        |
| Female                       | Ref.        |              |        |
| Male                         | 8.1         | -14.6, 30.7  | 0.484  |
| Age (years)                  | -3.4        | -7.2, 0.5    | 0.084  |
| Race/ethnicity               |             |              |        |
| Non-Hispanic Black           | Ref.        |              |        |
| Non-Hispanic White           | -21.6       | -554.8, 11.6 | 0.202  |
| Hispanic or Latino           | -38.0       | -59.1, -17.0 | <0.001 |
| Other                        | -16.5       | -62.3, 29.4  | 0.480  |
| Medicaid insurance           | 4.6         | -28.2, 37.5  | 0.782  |
| Family composition           |             |              |        |
| Two parents                  | Ref.        |              |        |
| Mother only                  | 9.1         | -14.3, 32.6  | 0.444  |
| Other                        | -3.7        | -41.4, 33.9  | 0.845  |
| Food insecurity              | -23.0       | -46.1, 0.1   | 0.051  |
| Meals out (days/week)        | -3.5        | -9.7, 2.7    | 0.265  |
| Breakfast (days/week)        | 3.4         | 0.5, 6.2     | 0.021  |

CI, confidence interval; Ref., reference category.

**Table S3.** Multivariable quantile regression of energy intake from non-soda SSB (kcal/day; N=321 visits).

| Variable                     | Coefficient | 95% CI       | P     |
|------------------------------|-------------|--------------|-------|
| Time since baseline (months) | -3.6        | -6.2, -1.0   | 0.008 |
| Sex                          |             |              |       |
| Female                       | Ref.        |              |       |
| Male                         | 1.3         | -50.6, 53.3  | 0.960 |
| Age (years)                  | 6.3         | 1.0, 13.5    | 0.089 |
| Race/ethnicity               |             |              |       |
| Non-Hispanic Black           | Ref.        |              |       |
| Non-Hispanic White           | -81.0       | -160.4, -1.5 | 0.046 |
| Hispanic or Latino           | -66.8       | -137.9, 4.4  | 0.066 |
| Other                        | -71.1       | -161.2, 19.0 | 0.121 |
| Medicaid insurance           | 28.3        | -41.4, 98.1  | 0.425 |
| Family composition           |             |              |       |
| Two parents                  | Ref.        |              |       |
| Mother only                  | -20.6       | -81.4, 40.2  | 0.505 |
| Other                        | -56.9       | -133.1, 19.4 | 0.143 |
| Food insecurity              | 10.0        | -40.4, 60.4  | 0.697 |
| Meals out (days/week)        | 29.9        | 6.3, 53.4    | 0.013 |
| Breakfast (days/week)        | -7.1        | -16.9, 2.7   | 0.157 |

CI, confidence interval; Ref., reference category.

**Table S4.** Multivariable quantile regression of percent of 95<sup>th</sup> percentile of body mass index (N=321 visits).

| Variable                                         | Coefficient | 95% CI      | P     |
|--------------------------------------------------|-------------|-------------|-------|
| Time since baseline (months)                     | 0.3         | 0.0, 0.7    | 0.064 |
| Calories from soda (100 kcal/day)                | 2.7         | 0.4, 5.1    | 0.022 |
| Calories from 100% juice (100 kcal/day)          | 0.9         | -1.2, 3.0   | 0.392 |
| Calories from SSB other than soda (100 kcal/day) | 0.1         | -1.7, 2.0   | 0.876 |
| Sex                                              |             |             |       |
| Female                                           | Ref.        |             |       |
| Male                                             | -3.7        | -12.4, 5.0  | 0.400 |
| Age (years)                                      | -0.4        | -1.9, 1.2   | 0.635 |
| Race/ethnicity                                   |             |             |       |
| Non-Hispanic Black                               | Ref.        |             |       |
| Non-Hispanic White                               | -16.4       | -32.8, 0.1  | 0.052 |
| Hispanic or Latino                               | -1.9        | -14.0, 10.1 | 0.750 |
| Other                                            | 0.7         | -19.3, 20.8 | 0.941 |
| Medicaid insurance                               | -4.9        | -21.3, 11.6 | 0.561 |
| Family composition                               |             |             |       |
| Two parents                                      | Ref.        |             |       |
| Mother only                                      | 1.1         | -11.0, 13.2 | 0.857 |
| Other                                            | 10.5        | -2.8, 23.7  | 0.121 |
| Food insecurity                                  | 6.0         | -3.9, 15.8  | 0.234 |
| Meals out (days/week)                            | -0.4        | -3.4, 2.7   | 0.800 |
| Breakfast (days/week)                            | -1.4        | -4.0, 1.3   | 0.302 |

CI, confidence interval; Ref., reference category; SSB, sugar sweetened beverages

**Table S5.** Multivariable cross-sectional quantile regression of energy intake from sugar-sweetened beverages and 100% fruit juice (kcal/day; N=590 patients).

| Variable              | Coefficient | 95% CI        | P     |
|-----------------------|-------------|---------------|-------|
| Sex                   |             |               |       |
| Female                | Ref.        |               |       |
| Male                  | -12.0       | -72.4, 48.5   | 0.698 |
| Age (years)           | -1.9        | -11.2, 7.3    | 0.679 |
| Race/ethnicity        |             |               |       |
| Non-Hispanic Black    | Ref.        |               |       |
| Non-Hispanic White    | -176.1      | -258.4, -93.9 | 0.000 |
| Hispanic or Latino    | -128.2      | -208.7, -47.7 | 0.002 |
| Other                 | -.31        | -135.6, 135.0 | 0.996 |
| Medicaid insurance    | 58.3        | -20.1, 136.7  | 0.145 |
| Family composition    |             |               |       |
| Two parents           | Ref.        |               |       |
| Mother only           | 2.4         | -70.0, 74.8   | 0.948 |
| Other                 | 49.0        | -32.8, 130.9  | 0.239 |
| Food insecurity       | 51.0        | -15.9, 117.9  | 0.135 |
| Meals out (days/week) | 61.4        | 39.0, 83.9    | 0.000 |
| Breakfast (days/week) | .36         | -11.2, 12.0   | 0.951 |

CI, confidence interval; Ref., reference category

**Table S6.** Multivariable cross-sectional quantile regression of energy intake from Soda (kcal/day; N=591 patients).

| Variable              | Coefficient | 95% CI      | P     |
|-----------------------|-------------|-------------|-------|
| Sex                   |             |             |       |
| Female                | Ref.        |             |       |
| Male                  | -4.1        | -15.8, 7.5  | 0.488 |
| Age (years)           | 0.1         | -1.7, 1.9   | 0.919 |
| Race/ethnicity        |             |             |       |
| Non-Hispanic Black    | Ref.        |             |       |
| Non-Hispanic White    | -5.2        | -21.1, 1.07 | 0.519 |
| Hispanic or Latino    | -6.1        | -21.7, 9.4  | 0.439 |
| Other                 | 5.6         | -20.5, 31.7 | 0.673 |
| Medicaid insurance    | 11.7        | -3.3, 26.8  | 0.126 |
| Family composition    |             |             |       |
| Two parents           | Ref.        |             |       |
| Mother only           | -5.9        | -19.8, 8.1  | 0.407 |
| Other                 | 8.2         | -7.6, 24.0  | 0.307 |
| Food insecurity       | 19.0        | 6.1, 31.9   | 0.004 |
| Meals out (days/week) | 5.2         | 0.9, 9.6    | 0.018 |
| Breakfast (days/week) | -2.1        | -4.3, 0.2   | 0.070 |

CI, confidence interval; Ref., reference category

**Table S7.** Multivariable cross-sectional quantile regression of energy intake from 100% Juice (kcal/day; N=591 patients).

| Variable              | Coefficient | 95% CI       | P      |
|-----------------------|-------------|--------------|--------|
| Sex                   |             |              |        |
| Female                | Ref.        |              |        |
| Male                  | 11.0        | -3.8, 25.7   | 0.145  |
| Age (years)           | -3.7        | -5.9, -1.4   | 0.002  |
| Race/ethnicity        |             |              |        |
| Non-Hispanic Black    | Ref.        |              |        |
| Non-Hispanic White    | -42.1       | -62.2, -22.1 | <0.001 |
| Hispanic or Latino    | -32.9       | -52.5, -13.3 | 0.001  |
| Other                 | -17.2       | -50.1, 15.8  | 0.306  |
| Medicaid insurance    | 12.2        | -6.8, 31.2   | 0.208  |
| Family composition    |             |              |        |
| Two parents           | Ref.        |              |        |
| Mother only           | 1.8         | -15.8, 19.4  | 0.839  |
| Other                 | 11.0        | -9.0, 30.9   | 0.281  |
| Food insecurity       | -16.4       | -32.7, -0.2  | 0.048  |
| Meals out (days/week) | 3.3         | -2.1, 8.8    | 0.234  |
| Breakfast (days/week) | 3.7         | 0.8, 6.4     | 0.011  |

CI, confidence interval; Ref., reference category

**Table S8.** Multivariable cross-sectional quantile regression of energy intake from non-soda SSB (kcal/day; N=590 patients).

| Variable              | Coefficient | 95% CI        | P     |
|-----------------------|-------------|---------------|-------|
| Sex                   |             |               |       |
| Female                | Ref.        |               |       |
| Male                  | 3.3         | -46.8, 53.3   | 0.898 |
| Age (years)           | 1.1         | -6.6, 8.7     | 0.784 |
| Race/ethnicity        |             |               |       |
| Non-Hispanic Black    | Ref.        |               |       |
| Non-Hispanic White    | -93.9       | -162.0, -25.8 | 0.007 |
| Hispanic or Latino    | -86.5       | -153.2, -19.9 | 0.011 |
| Other                 | -33.1       | -145.1, 80.0  | 0.562 |
| Medicaid insurance    | 41.0        | -24.0, 105.9  | 0.216 |
| Family composition    |             |               |       |
| Two parents           | Ref.        |               |       |
| Mother only           | -28.0       | -88.0, 31.9   | 0.359 |
| Other                 | 6.6         | -61.1, 74.4   | 0.848 |
| Food insecurity       | 39.9        | -15.5, 95.3   | 0.158 |
| Meals out (days/week) | 51.7        | 33.1, 70.3    | 0.000 |
| Breakfast (days/week) | -8.6        | -18.2, 1.0    | 0.078 |

CI, confidence interval; Ref., reference category



**Table S9.** Multivariable cross-sectional quantile regression of percent of 95<sup>th</sup> percentile of body mass index (N=590 patients; all beverage types together).

| Variable                                            | Coefficient | 95% CI      | P     |
|-----------------------------------------------------|-------------|-------------|-------|
| Calories from SSB + 100% fruit juice (100 kcal/day) | -0.1        | -0.8, 0.6   | 0.767 |
| Sex                                                 |             |             |       |
| Female                                              | Ref.        |             |       |
| Male                                                | 0.7         | -4.5, 5.9   | 0.794 |
| Age (years)                                         | -0.7        | -1.5, 0.1   | 0.096 |
| Race/ethnicity                                      |             |             |       |
| Non-Hispanic Black                                  | Ref.        |             |       |
| Non-Hispanic White                                  | -4.0        | -11.1, 3.1  | 0.271 |
| Hispanic or Latino                                  | -10.9       | -17.8, -3.9 | 0.002 |
| Other                                               | -6.4        | -17.9, 5.2  | 0.281 |
| Medicaid insurance                                  | -4.1        | -10.8, 2.7  | 0.234 |
| Family composition                                  |             |             |       |
| Two parents                                         | Ref.        |             |       |
| Mother only                                         | 0.6         | -5.6, 6.8   | 0.857 |
| Other                                               | -0.8        | -7.8, 6.2   | 0.824 |
| Food insecurity                                     | 4.8         | -0.9, 10.5  | 0.100 |
| Meals out (days/week)                               | 0.3         | -1.7, 2.3   | 0.761 |
| Breakfast (days/week)                               | -1.6        | -2.6, -0.6  | 0.002 |

CI, confidence interval; Ref., reference category; SSB, sugar sweetened beverages

**Table S10.** Multivariable cross-sectional quantile regression of percent of 95<sup>th</sup> percentile of body mass index (N=590 patients; beverage types separate).

| Variable                                         | Coefficient | 95% CI      | P     |
|--------------------------------------------------|-------------|-------------|-------|
| Calories from soda (100 kcal/day)                | 0.3         | -1.6, 2.1   | 0.771 |
| Calories from 100% juice (100 kcal/day)          | -0.8        | -2.6, 0.9   | 0.341 |
| Calories from SSB other than soda (100 kcal/day) | 0.0         | -1.2, 1.7   | 0.982 |
| Sex                                              |             |             |       |
| Female                                           | Ref.        |             |       |
| Male                                             | 1.3         | -4.2, 6.7   | 0.648 |
| Age (years)                                      | -0.7        | -1.5, 0.2   | 0.108 |
| Race/ethnicity                                   |             |             |       |
| Non-Hispanic Black                               | Ref.        |             |       |
| Non-Hispanic White                               | -3.9        | -11.4, 3.6  | 0.304 |
| Hispanic or Latino                               | -10.7       | -18.0, -3.4 | 0.004 |
| Other                                            | -7.0        | -19.1, 5.1  | 0.257 |
| Medicaid insurance                               | -4.0        | -11.1, 3.0  | 0.262 |
| Family composition                               |             |             |       |
| Two parents                                      | Ref.        |             |       |
| Mother only                                      | 0.5         | -6.0, 7.0   | 0.883 |
| Other                                            | -0.8        | -8.2, 6.5   | 0.822 |
| Food insecurity                                  | 5.8         | -0.2, 11.8  | 0.056 |
| Meals out (days/week)                            | 0.2         | -1.9, 2.3   | 0.873 |
| Breakfast (days/week)                            | -1.5        | -2.6, -0.5  | 0.005 |

CI, confidence interval; Ref., reference category; SSB, sugar sweetened beverages
